# Supplementary material for: Is our dynamical understanding of the circulation changes associatedwith the Antarctic ozone hole sensitive to the choice of reanalysis dataset?
Source: Copernicus journal article supplement (doi:10.5194/acp-2020-1288), 2020-12-23
Supplement: Supplementary file [file acp-2020-1288-AC1-supplement.pdf]

*Review of “Is our dynamical understanding of the circulation changes associated with the Antarctic ozone hole sensitive to the choice of reanalysis dataset?”*

**Anonymous Referee #1**

*In this study the authors compare the response of the Antarctic polar vortex to ozone depletion over the years 1980-2001 among four current reanalysis products. The study is well motivated, very well written and, for the most part, most of the main conclusions are supported by the text and figures. To this end, I recommend publication pending minor revisions. At the same time, however, the analysis does omit certain points (i.e., exclusion of parameterized waves in wind budgets) that should be addressed more explicitly both in the text and through incorporation of a new supplementary figure (see comments below).*

**We are grateful for the time taken by the Referee to provide such well-considered and insightful comments, especially their suggestion to consider other terms of the momentum budget (which was also suggested by Referee #2). We are pleased that they found the results meaningful and the paper clearly written. We have implemented all of their comments, which are explained below and have undoubtedly strengthened the revised manuscript. We very much hope that the referee is satisfied by these improvements.**

*(1) Major Comment: The budget analysis does not include the effect of parameterized gravity wave drag. Nor is the tendency due to the potential imbalance caused by the incremental analysis during data assimilation included. While neglecting these terms may not matter much in the lower stratosphere, I am not convinced that neglecting these terms is likewise trivial in the upper/middle polar stratosphere. At present, though, because the residuals are not shown the reader has no way of evaluating how well the zonal wind budgets are closed in the upper/middle stratosphere. In particular, is it possible that one of the main drivers of the differences between CSFR and the other reanalysis datasets is the contribution from parameterized GWD? Have the authors done the analysis? Is there really no way of getting access to these missing tendencies? If the answer to the latter is no, then at the very least the authors should provide a new supplementary figure that shows how well they can balance the budget for each reanalysis product.*

**Reply: The decision to omit examination of the Residual term (e.g., made up from parameterised gravity wave drag, analysis increments, ageostrophic terms) is based on two arguments. Firstly, the use of the quasi-geostrophic TEM approximation for the momentum budget precludes us from a meaningful analysis of the residual terms in the momentum budget, i.e., it is not the most appropriate framework for analysis at that level. Secondly, we do not have access to all the necessary terms in the budget across all reanalyses to examine this, i.e., the impact of analysis increments and gravity wave drag are included in a single term, the residual.**

**The TEM framework is ideal for understanding the momentum budget, identifying the dominant balance between the Coriolis torque on the net poleward transport of mass (quantified by the residual circulation) and the transport of momentum by Rossby waves – which is the main focus of our study, and therefore we have employed the correct methodology/tool. By contrast, the Eulerian mean momentum budget is more appropriate for a detailed analysis of the residual terms, as ageostrophic terms of the same order aren't explicitly taken into account here. But the Eulerian budget obscures the dominant balance between Coriolis forcing acting on the Lagrangian mean circulation and the eddy forcing, and so would be unsuitable for our study. For example, the Coriolis torque on the Eulerian mean circulation is of opposite sign to the actual transport of mass across much of the stratosphere, as with the Ferrell cell in the troposphere. As mentioned above, we do agree that parameterized gravity wave momentum drag can be incorporated in the TEM, but we did not have complete access to the necessary data. However, separating the role of gravity wave drag and analysis increment should be the topic of future work, and is something that I am interested in pursuing.**

**We have modified the manuscript at several points to be clear to the reader about this limitation in our analysis. First, the discussion of the TEM momentum budget (Eq. 1) has been updated to more explicitly list missing terms, and we explain in more detail how the eddy terms feed into the budget at the end of section 3.1. Second, we've included new panels in Figure 4 to show that the dominant balance in the momentum equation is between the Coriolis torque and the wave-driven forcing. Finally, we've added a new paragraph in the Discussion and Summary section to emphasize that our analysis of the budget does**

not allow us to identify the cause of the anomalies. The “first cause” is the change in radiative heating, which causes angular momentum surface to slump as to remain in thermal wind balance. Our main message is that the consistency between the representation of the mean trends and the eddy terms strengthens our confidence in the overall representation of the response.

For example, some of the changes include:

- In the Data and Methods section, the following new paragraph: *‘The key variables examined in Eq. (1) are the trends in the wave forcing (EPFD), and the Coriolis torque  $f\bar{v}^*$ . Our use of the QG TEM approximation for the momentum budget and the lack of complete access to all the relevant data, preclude us from a meaningful analysis of the trends in the residual term in the momentum budget, so therefore this term is not considered. The residual term includes both parameterized gravity wave drag (e.g., Lott and Miller, 1997; Orr et al., 2010) and reanalysis increments in the momentum budget, but also ageostrophic terms and any numerical biases in the model (which therefore cannot be separated as they are included in a single term). The TEM framework is ideal as a diagnostic tool for identifying the dominant balance between the Coriolis torque on the net poleward transport of mass (quantified by the residual circulation) and the transport of momentum by Rossby waves (quantified by the EPFD term), i.e., examining how changes in these two terms relate to changes in the zonal mean wind, which is therefore the focus of this work. On seasonal time-scales, the EPFD and Coriolis torque terms are the leading order balance in the system: momentum transfer in the free atmosphere is controlled dynamically via eddy heat and momentum transfer (Palmer, 1981).’*
- In the Discussion and Conclusions section, extensive modification to the following paragraph: *‘Consistent with quasi-geostrophic scaling, trends in the Coriolis torque on the residual circulation were nearly in balance with opposite trends in the eddy momentum divergence (EPFD term), as shown in Figure 4. These changes in wave forcing and wave propagation are described by Orr et al. (2012, 2013), as well as other studies such as Hartmann et al. (2000), McLandress et al. (2010, 2011), and Hu et al. (2015). They agree with the temporal evolution of the zonal wind trends, but do not indicate causality. The origin of wind anomalies begins with the slumping of angular momentum surfaces in response to changes in radiative heating by ozone, i.e., the movement of mass to maintain thermal wind balance. The total response depends further on feedback with the resolved eddy forcing, changes in parameterized gravity wave drag, and other ageostrophic terms in the momentum budget. For example, the poleward displacement and intensification of the tropospheric polar front jet in response to the ozone hole is likely to have changed Southern Hemisphere unresolved sources of orographic gravity waves generated by flow impinging on Antarctica (e.g., Hoffmann et al., 2016) and non-orographic gravity waves generated by Southern Ocean storm tracks (e.g., Charron and Manzini, 2002), resulting in changes to the momentum fluxes and drag. However, separating the influence of gravity wave drag, the impact of reanalysis increments, and other residual terms is beyond the scope of the manuscript; as we have used a dataset interpolated to a common grid for the most consistent comparison of the reanalyses, and lack access to all the necessary terms in the residual. This should be the topic of future work. None-the-less, we emphasize the consistency of the dominant balance of the eddy terms with the zonal mean trends, despite the fact that the latter are better constrained by available observations. This internal consistency gives us greater confidence in the overall reanalysis trends.’*

Minor Comments:

(2) Line 109: It is a bit odd that there is no mention of vertical resolution in the text nor in Table 1, especially since one would expect this to have an important impact on the representation of the (wave-driven) residual mean circulation. How does vertical resolution differ among the reanalyses? At the very least this information should be added as a new column in the table.

Reply: The vertical information has been added as a new column in Table 1. Additionally, the following sentence has been added to Section 2 (Data and Methods) of the revised manuscript to mention the differences in vertical resolution in the main text: *‘The vertical resolution of JRA-55, MERRA-2 and CSFR is broadly similar with approximately 60-70 levels from the surface up to around 0.1 hPa, whereas ERA5 uses 137 levels from the surface up to 0.01 hPa.’*

(3) *Missing primes in labels in Figures 4-8.*

**Reply: Primes have been added to Figures 4-8, and 10.**

(4) *Line 133-134: The authors write that they do not examine the individual EP flux components as they “require the vertical derivative of temperature...resulting in noisy wave driving”. And yet, later on they examine the EP flux divergence (which will partly reflect some of this undesirable noisiness, albeit somewhat smoothed). The analysis of the EP flux divergence is certainly fine but I would suggest that the authors rephrase their earlier caveat because it seems inconsistent with the EP flux divergence analysis presented later on in the manuscript.*

**Reply: This is a good point. Given that there is a clear explanation in the manuscript as to why we examine the eddy momentum flux  $\overline{u'v'}$ , the eddy heat flux  $\overline{v'T'}$ , and the EP flux divergence, a further explanation as to why we do not examine the individual EP flux components is not necessary. This sentence (explaining why we do not examine the individual EP flux components) has therefore been deleted.**

(5) *The dynamical inconsistency exhibited by CFSR (i.e. weaker reduction in upward wave activity despite stronger positive wind trend) is an important result as it exemplifies why caution is needed when analyzing momentum budgets in systems utilizing data assimilation. However, assimilation issues aside, how much of this apparent inconsistency just reflects a lack of correctly accounting for the tendency contributed by (unresolved) gravity waves? I suppose the authors address this in Line 417 but the description is extremely brief and speculative. Is there really no way to access these terms (see Major Comment)?*

**Reply: In our response to your major comment, we acknowledge the limitation of this analysis based on using the quasi-geostrophic TEM framework. We suspect that that reanalysis increments or changes in the representation of ozone are the key difference here, given the inconsistency between the response of the eddies to the mean winds. (There could be some compensation between changes in parameterized gravity waves and the resolved circulation, but we didn't have ready access to the data.) Trends are extremely sensitive to changes in the observing system, and we suspect that biases in the 1980s were reduced in later decades. As we now explain in the Discussion section, a limitation of our analysis is that both gravity wave drag and the impact of reanalyses increments are included in a single term, the Residual, and that separating the contribution from these terms should be the topic of future work.**

(6) *Line 420: In reference to the sentence beginning with “They showed that the sum of the wave driving...”. Is this true throughout the vertical? Is the contribution of parameterized waves really not important in the middle and upper stratosphere?*

**Reply: The dominant balance was consistently between the Coriolis torque on the residual circulation and the resolved eddy forcing. See revised Figure 4. We believe this is largely because we have restricted our analysis to below 30 hPa and to the middle to high latitudes. We expect that gravity wave torques become order one at higher levels, and potentially in the tropical atmosphere at these heights, though we have not looked explicitly. As we acknowledge in the paper, a limitation of our analysis is that both gravity wave drag and the impact of reanalyses increments are included in a single term, the Residual, and therefore we are unable to examine their separate contributions. This should be the topic of future work.**

(7) *The authors never explicitly show what the differences in the trends in the polar vortex and upper troposphere/lower stratosphere imply for the surface trends. Is the SH surface jet response also anomalous for CFSR? This seems like an important point that should be discussed.*

**Reply: This is a good point. We have added an additional figure (labelled Figure A2 in the revised manuscript) that shows the trends in the zonally averaged zonal wind at 850 hPa, i.e., analogous to Figure 3, which shows results at 500 hPa. This clearly shows that the CFSR results are still anomalous at near-surface level, which is consistent with the tropospheric response being largely barotropic. This new figure**

is explained after Figure 3 in the Results section, using the following text: *‘Note that the anomalous CFSR trend in the polar front jet compared to the other reanalyses is even more apparent at 850 hPa (Figure A2), i.e., near the surface and consistent with fairly uniform (barotropic) wind trend anomalies throughout the troposphere.’*

Additionally, we have added the following new text to the Discussion section: *‘These results are consistent with Dong et al. (2020), who examined near-surface summer wind speed trends for the 1980-2018 period over Antarctica in six reanalysis products (including ERA5, JRA-55, MERRA-2, and CFSR), and also found differences in the magnitude of wind speed trends.’*

Dong, X., Wang, Y., Hou, S., Ding, M., Yin, B., and Zhang, Y.: Robustness of the recent global atmospheric reanalyses for Antarctic near-surface wind speed climatology, *J. Clim.*, 33, 4027-4043, <https://doi.org/10.1175/JCLI-D-19-0648.1>, 2020.
